# Supplementary material for: Gender-Based Clinical, Therapeutic Strategies and Prognosis Differences in Atrial Fibrillation
Source: MDPI journal article supplement (doi:10.3390/jcdd10100434), 2023-10-18
Supplement: s1 [file s1]

## SUPPLEMENTARY DATA

**Table S1.** Antiarrhythmic and diuretic treatment at admission in the emergency department according to gender.

|            | Total (N=2013) | Males (N=800) | Females (N=1213) | p-value |
|------------|----------------|---------------|------------------|---------|
| Amiodarone | 154 (7.7%)     | 66 (8.3%)     | 88 (7.3%)        | 0.411   |
| Flecainide | 91(4.5%)       | 24 (3.0%)     | 67 (5.5%)        | 0.008   |
| β-blockers | 608 (30.2%)    | 219 (27.4%)   | 389 (32.1%)      | 0.025   |
| Digoxin    | 142 (7.0%)     | 54 (6.8%)     | 98 (8.1%)        | 0.269   |
| Diuretics  | 875 (43.5%)    | 280 (35.0%)   | 595 (49%)        | 0.05*   |

**Table S2.** Antiarrhythmic and diuretics treatment at discharge from the emergency department according to gender.

|            | Total (N=2013) | Males (N=800) | Females (N=1213) | p-value |
|------------|----------------|---------------|------------------|---------|
| Amiodarone | 317 (15.7%)    | 136 (17%)     | 181 (14.9%)      | 0.210   |
| Flecainide | 78 (3.9%)      | 33 (4.1%)     | 45 (3.7%)        | 0.637   |
| β-blockers | 859 (42.7%)    | 322 (40.2%)   | 537 (44.3%)      | 0.074   |
| Digoxin    | 227 (11.3%)    | 69 (8.6%)     | 158 (13%)        | 0.002*  |
| Diuretics  | 604 (30%)      | 206 (25.7%)   | 398 (32.8%)      | 0.001*  |
